# Supplementary material for: Strategy-dependent effects of working-memory limitations on human perceptual decision-making
Source: eLife journal article supplement (doi:10.7554/elife.73610), 2022-03-15

### a Perceived trials

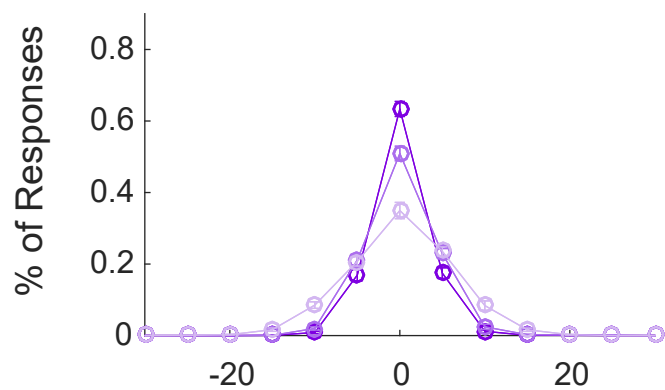

0 s Delay, N=1

1 s Delay, N=1

6 s Delay, N=1

0 s Delay, N=2

1 s Delay, N=2

6 s Delay, N=2

0 s Delay, N=5

1 s Delay, N=5

6 s Delay, N=5

b

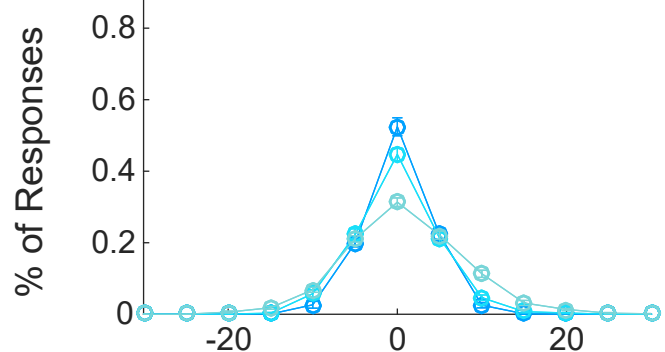

d

### Computed trials

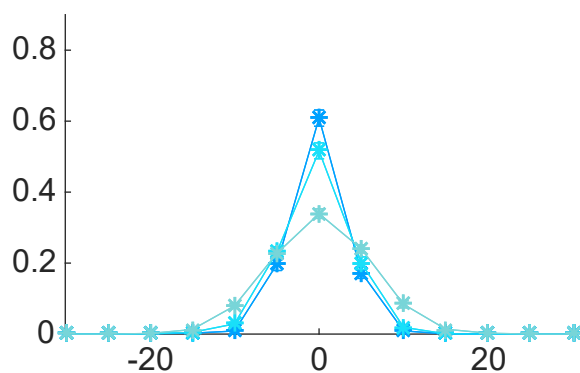

c

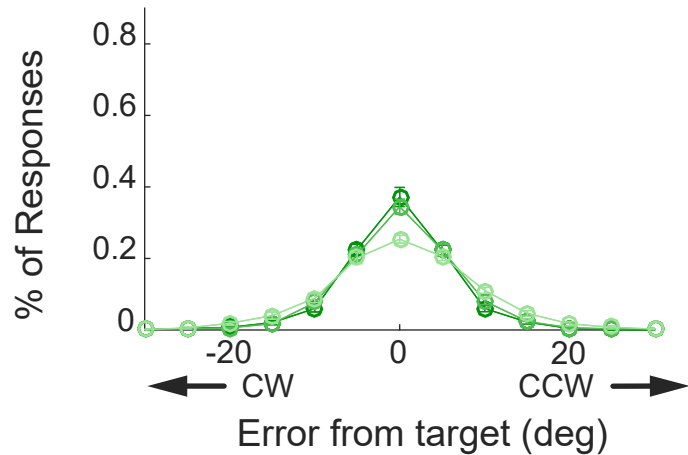

e

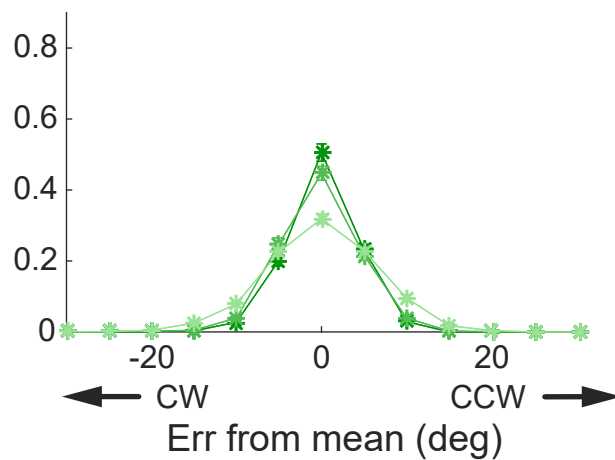

Supplement: supp [file elife-73610-supp-v1.zip]
