# Supplementary figures and images for: Strategy-dependent effects of working-memory limitations on human perceptual decision-making
Source: eLife journal article supplement (doi:10.7554/elife.73610), 2022-03-15

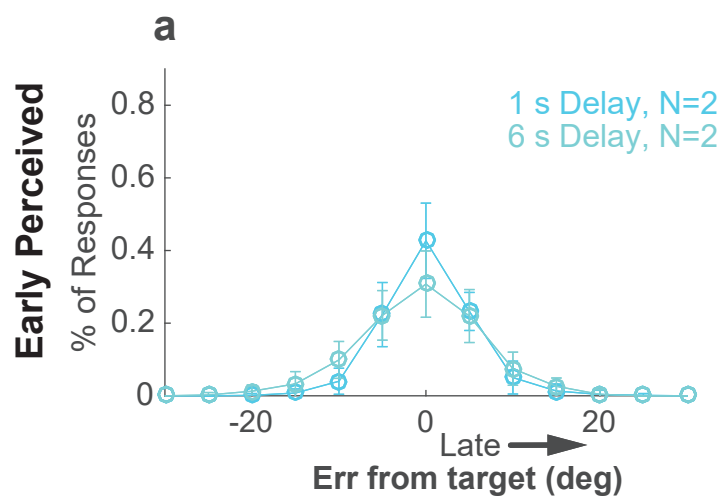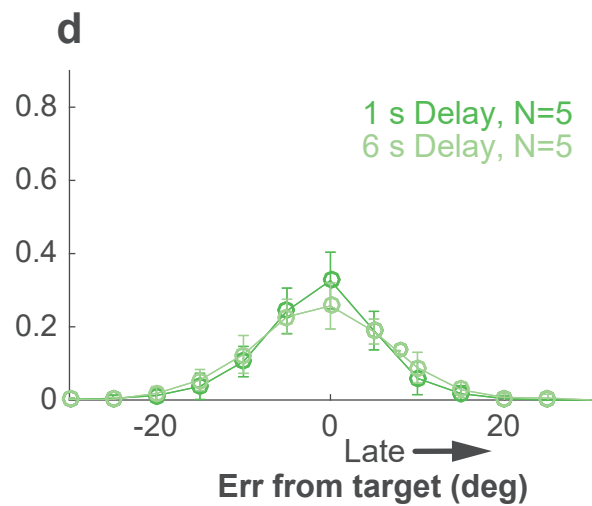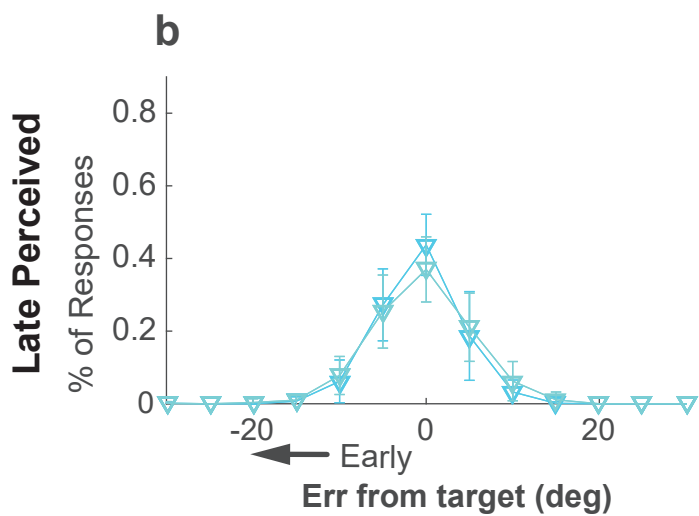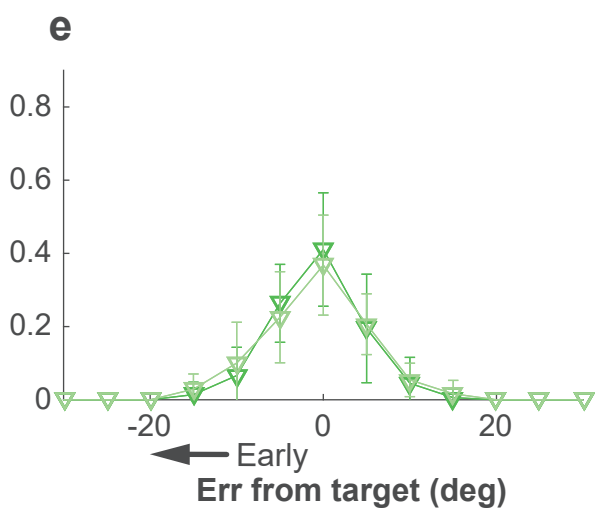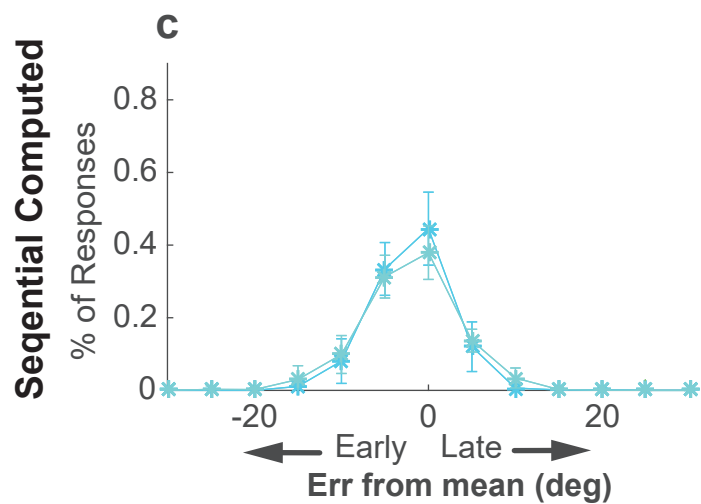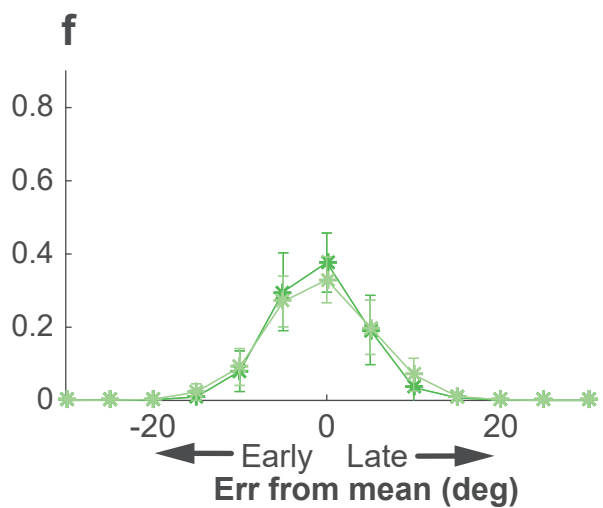

Supplement: supp [file elife-73610-supp-v1.zip]

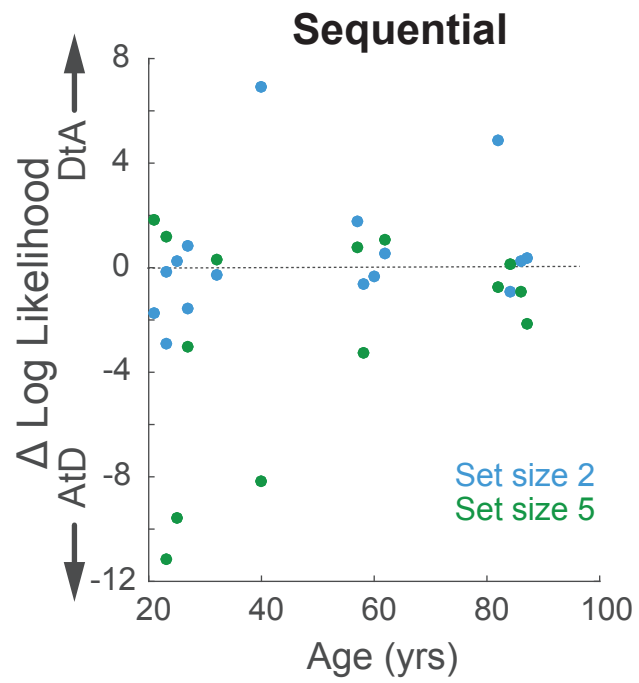

Supplement: supp [file elife-73610-supp-v1.zip]

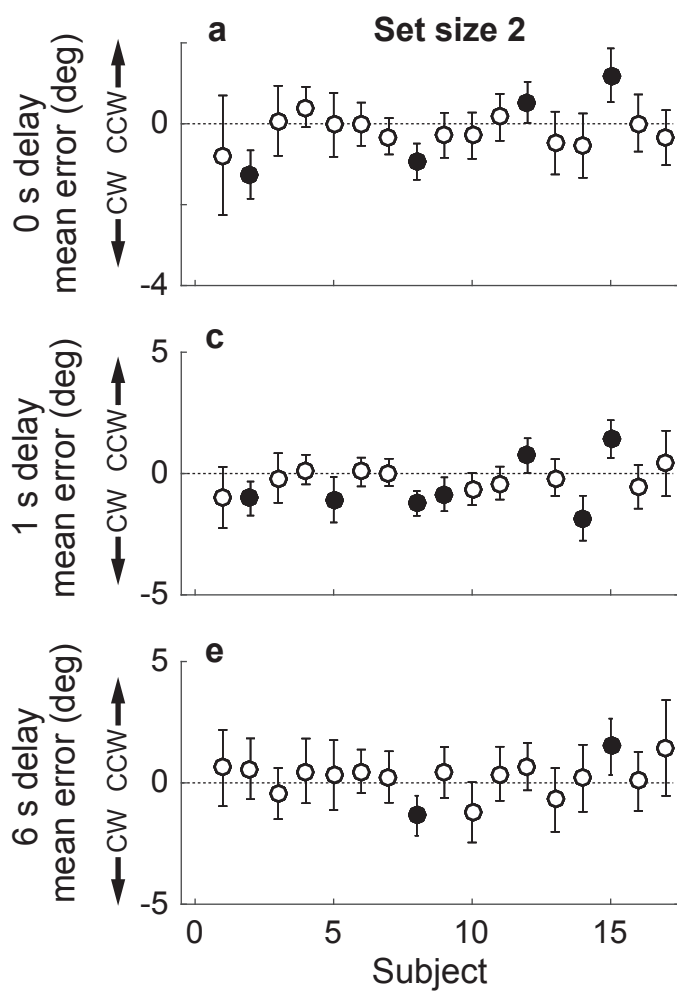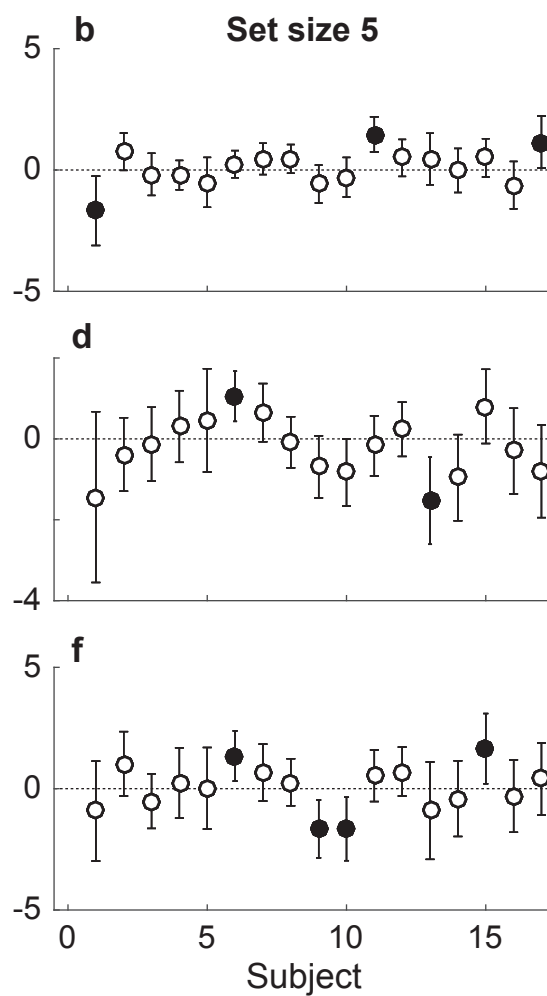

Supplement: supp [file elife-73610-supp-v1.zip]

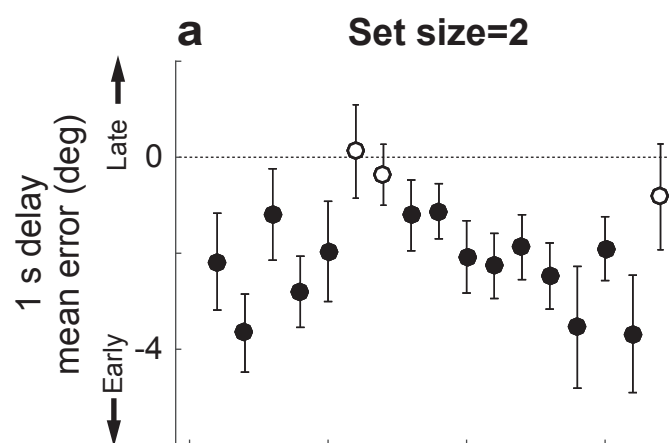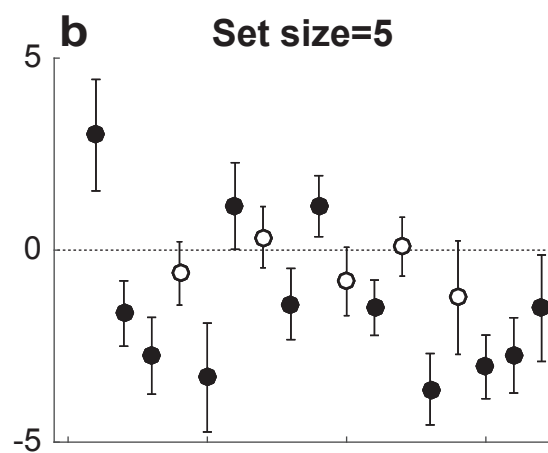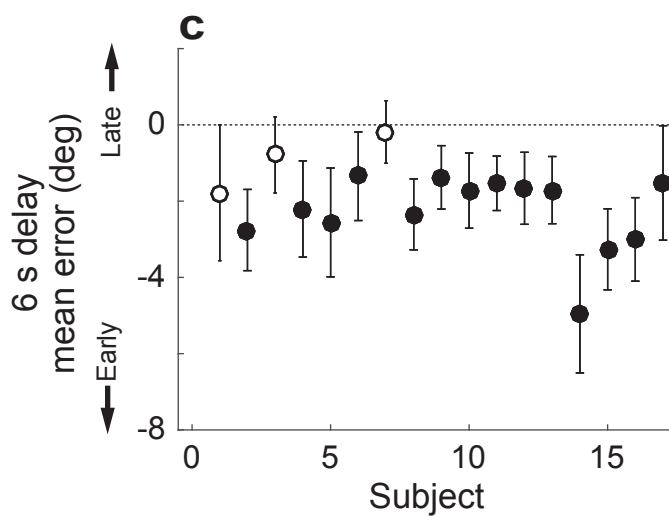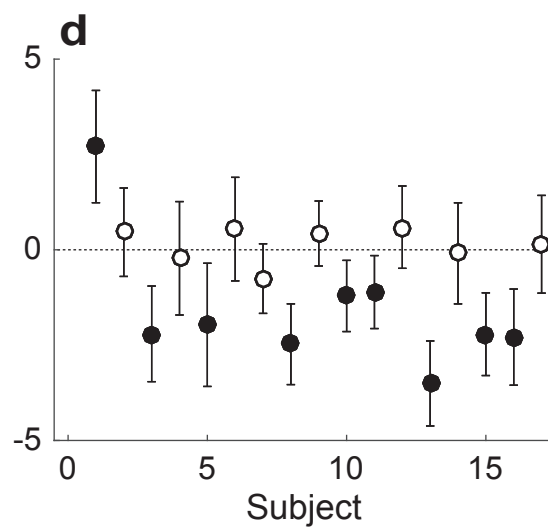

Supplement: supp [file elife-73610-supp-v1.zip]

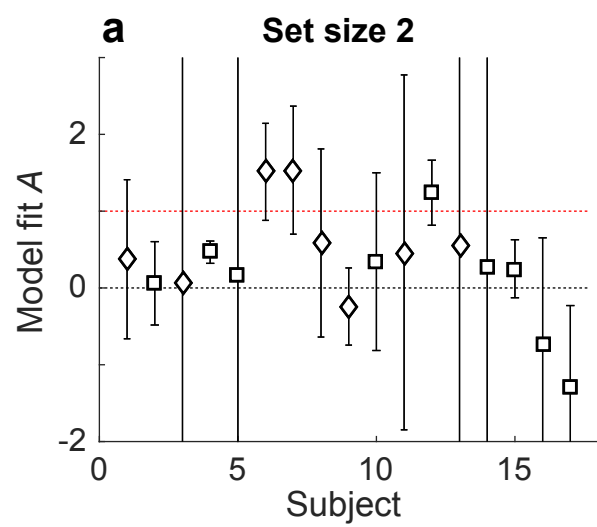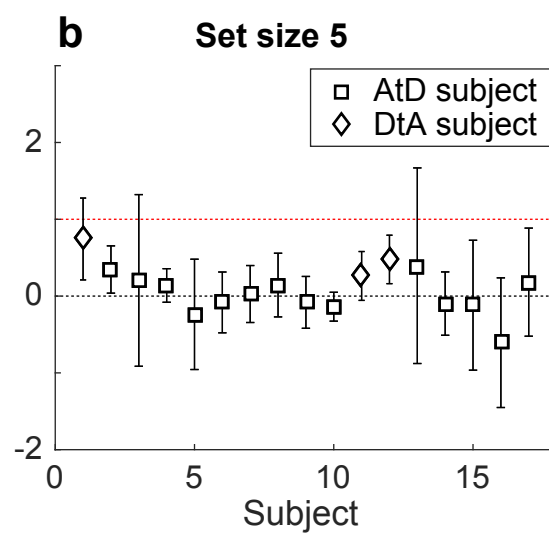

Supplement: supp [file elife-73610-supp-v1.zip]

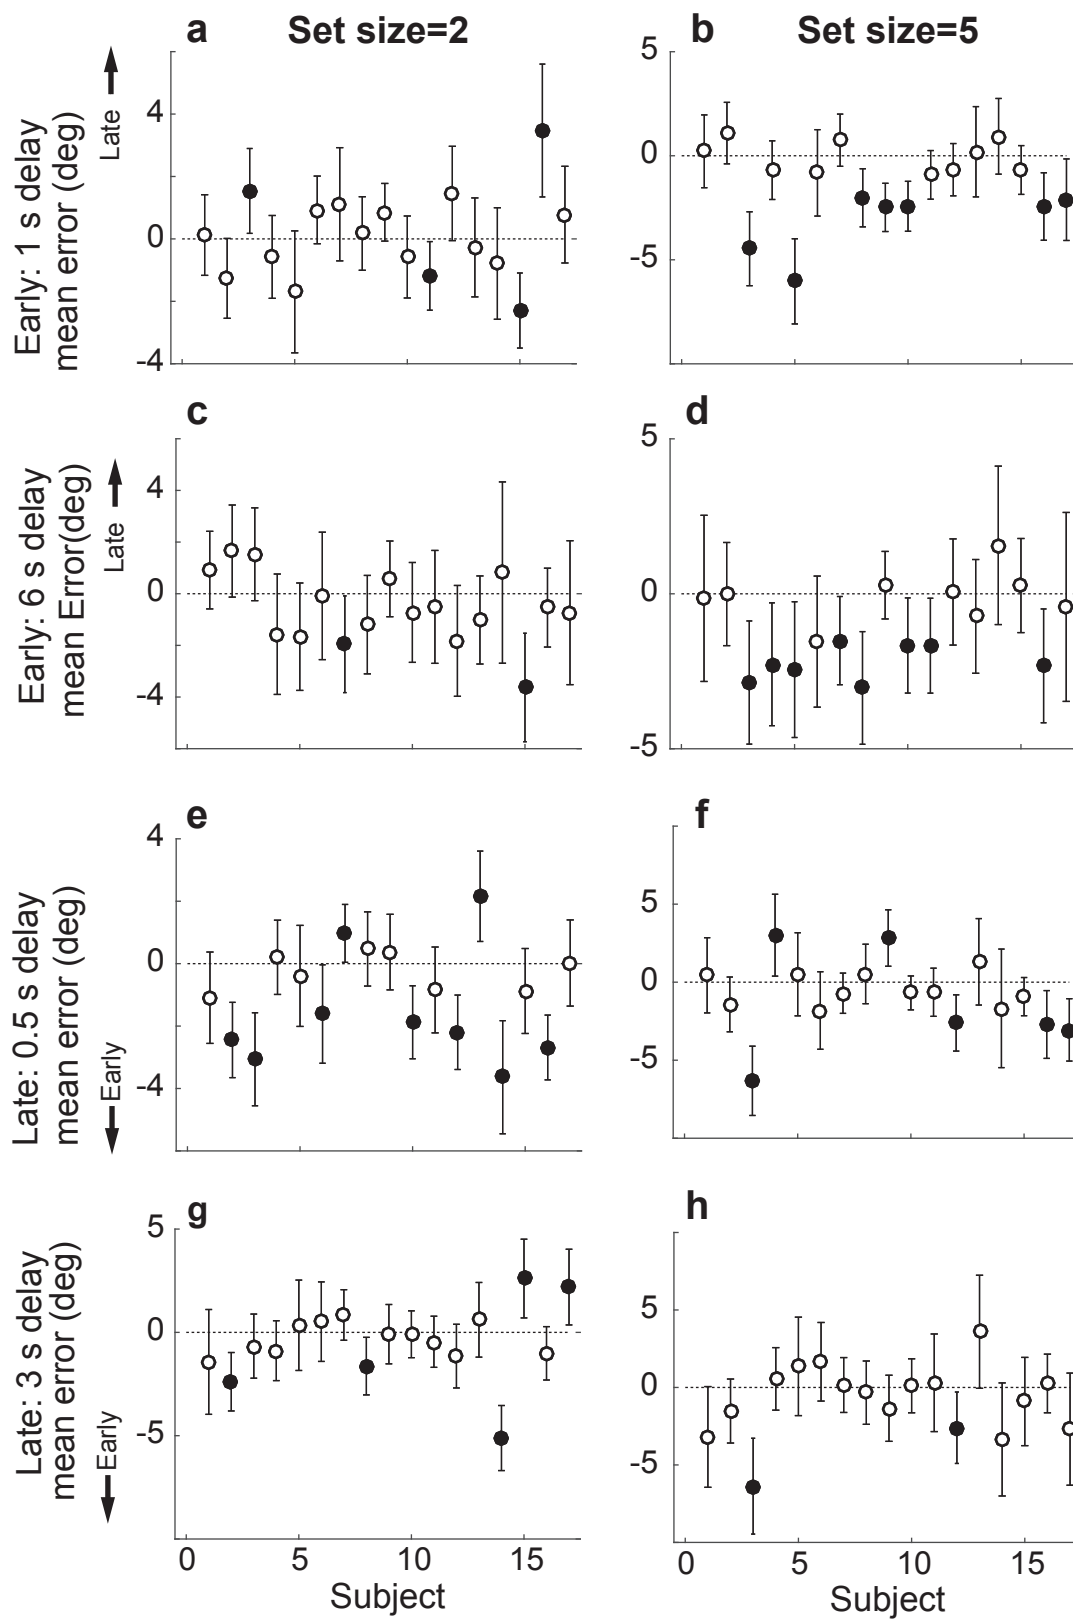

Supplement: supp [file elife-73610-supp-v1.zip]

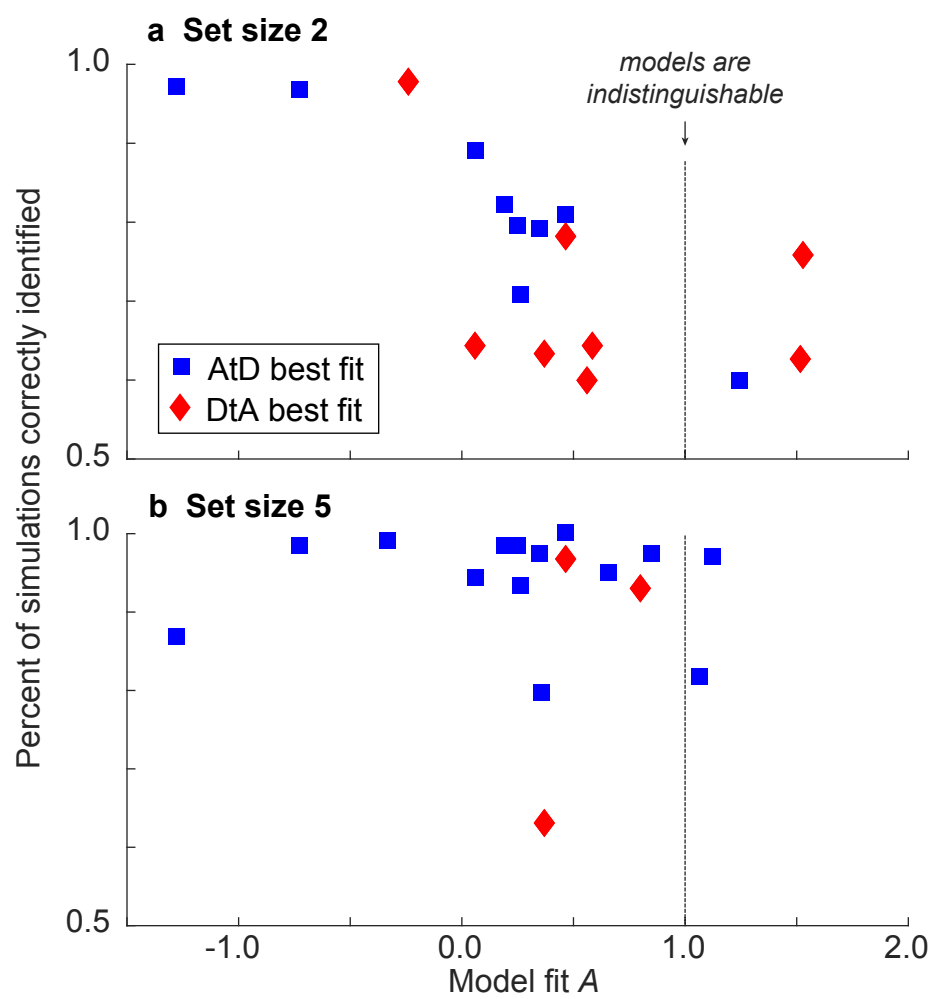

Supplement: supp [file elife-73610-supp-v1.zip]

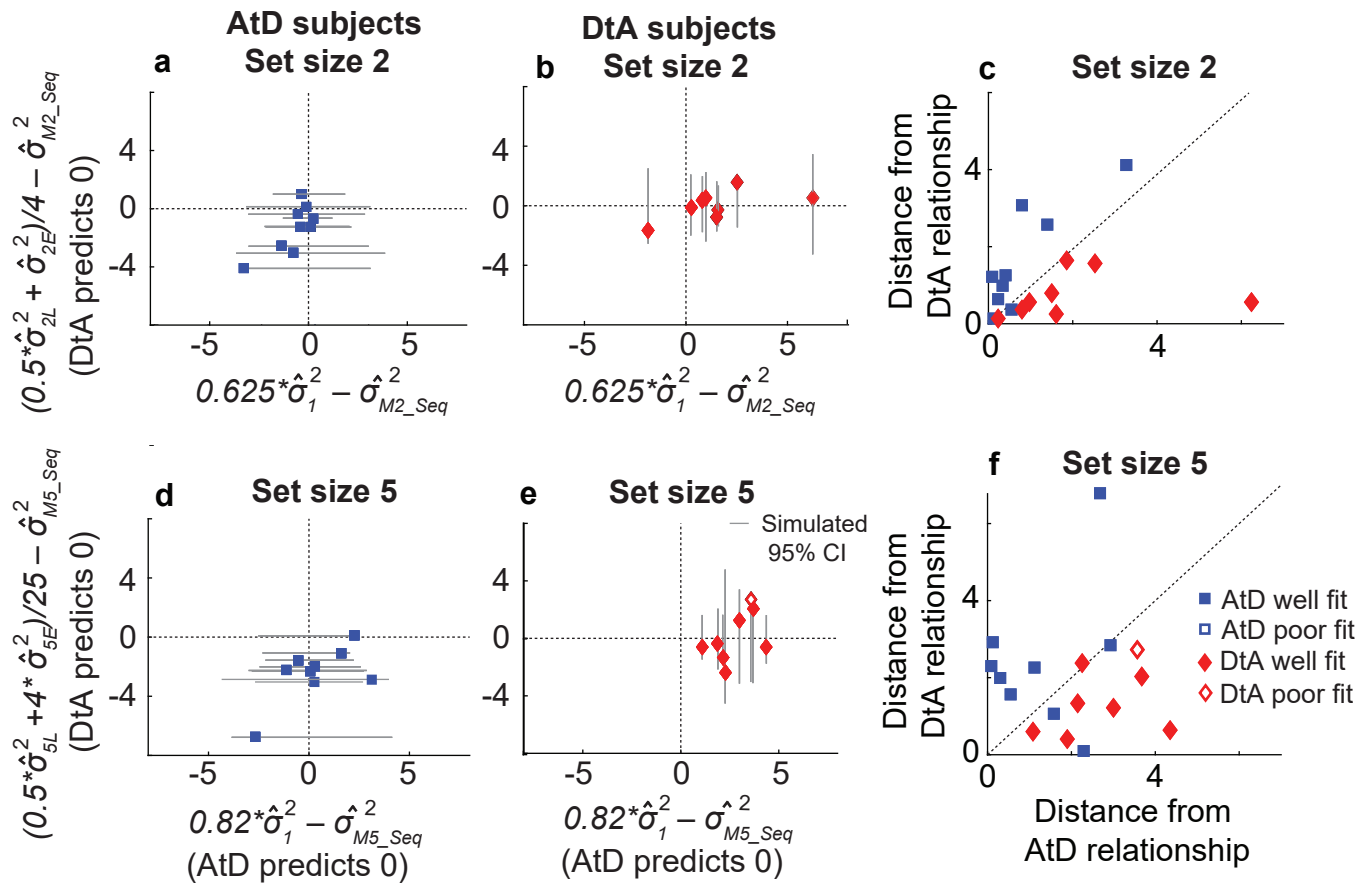

Supplement: supp [file elife-73610-supp-v1.zip]

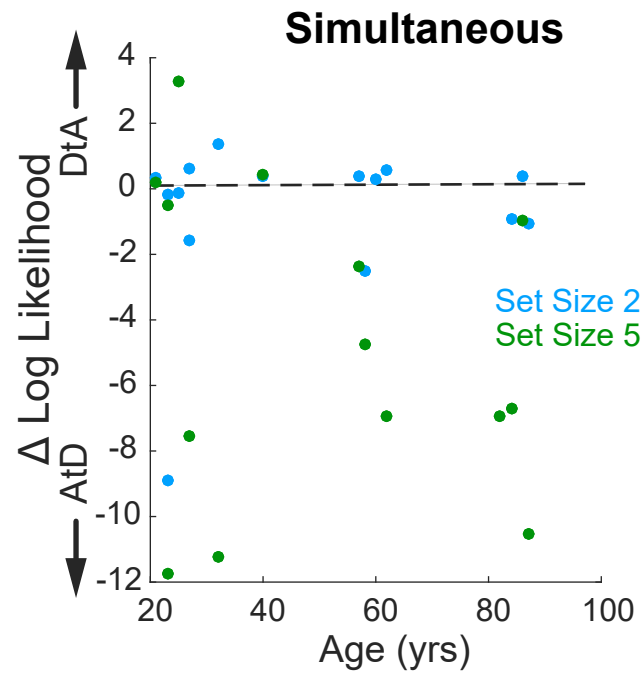

Supplement: supp [file elife-73610-supp-v1.zip]

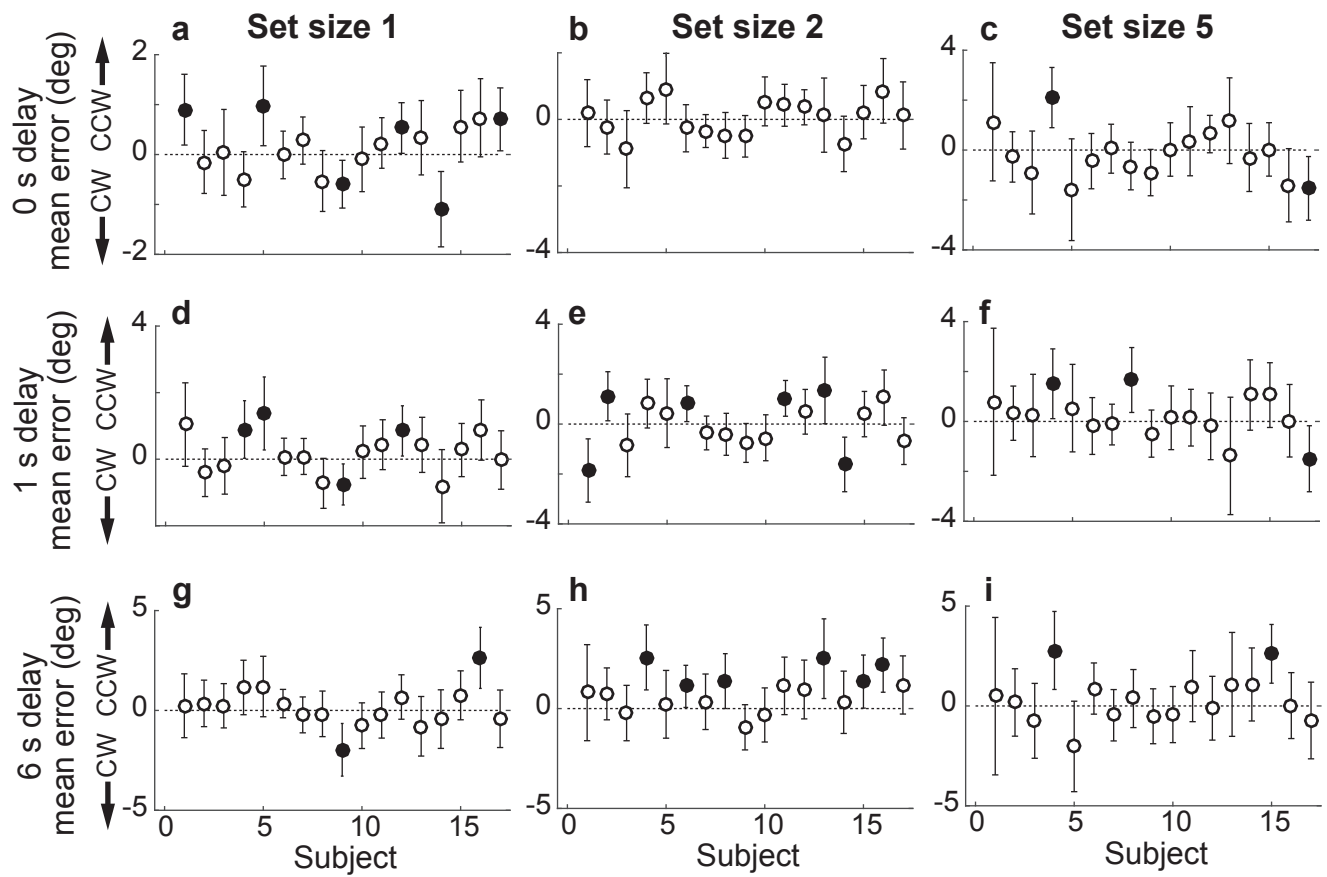

Supplement: supp [file elife-73610-supp-v1.zip]
